# Supplementary material
Source: PubMed Central journal article supplement (PMC7242129)
Supplement: NIHMS1541266-supplement-1.pdf [file NIHMS1541266-supplement-1.pdf]

## Stress disorders and psychiatric comorbidity

Supplemental Table 1. Number of Incident Psychiatric Diagnoses Following a Stress Disorder Diagnosis in Children (6 – 15 years) in Denmark, 1995-2011.

|                                                        | Stress Cohort<br>(N = 10,018) | Acute Stress Reaction<br>(N = 854) | PTSD<br>(N = 246) | Adjustment Disorder<br>(N = 5,411) | ORSS<br>(N = 600) | RSSU<br>(N = 2907) | Comparison Cohort<br>(N = 55,842) |
|--------------------------------------------------------|-------------------------------|------------------------------------|-------------------|------------------------------------|-------------------|--------------------|-----------------------------------|
| Number of different incident psychiatric diagnoses (%) |                               |                                    |                   |                                    |                   |                    |                                   |
| 0                                                      | 82                            | 86                                 | 81                | 81                                 | 88                | 82                 | 97                                |
| 1                                                      | 13                            | 11                                 | 13                | 14                                 | 9.2               | 13                 | 2.3                               |
| 2+                                                     | 4.4                           | 3.0                                | 5.3               | 4.4                                | 3.3               | 4.8                | 0.5                               |

Notes: PTSD = posttraumatic stress disorder. ORSS = Other reactions to severe stress. RSSU = Reactions to severe stress unspecified.

Stress disorders and psychiatric comorbidity

Supplemental Table 2. Average Time to Incident Psychiatric Diagnoses following a Stress Disorder Diagnosis in Children (6 – 15 years), in Denmark, 1995-2011.

| Baseline stress disorder               | Average time to incident psychiatric diagnoses (years) |                            |                             |
|----------------------------------------|--------------------------------------------------------|----------------------------|-----------------------------|
|                                        | Incident Depressive disorders                          | Incident Anxiety disorders | Incident Behavior disorders |
| Acute stress reaction                  | 3.3                                                    | 4.3                        | 1.9                         |
| PTSD                                   | 3.8                                                    | 4.2                        | 3.4                         |
| Adjustment disorder                    | 4.2                                                    | 4.9                        | 2.7                         |
| Other reactions to severe stress       | 3.7                                                    | 3.0                        | 3.2                         |
| Reactions to severe stress unspecified | 3.5                                                    | 4.1                        | 2.1                         |
| Stress cohort                          | 3.9                                                    | 4.5                        | 2.5                         |
| Comparison cohort                      | 5.9                                                    | 6.3                        | 3.8                         |
